# Supplementary material for: Suppression of AGR2 in a TGF-β-induced Smad regulatory pathway mediates epithelial-mesenchymal transition
Source: PubMed Central journal article supplement (PMC5557473; doi:10.1186/s12885-017-3537-5), 2017-08-15
Supplement: 12885_2017_3537_MOESM1_ESM.pdf [file 12885_2017_3537_MOESM1_ESM.pdf]

A

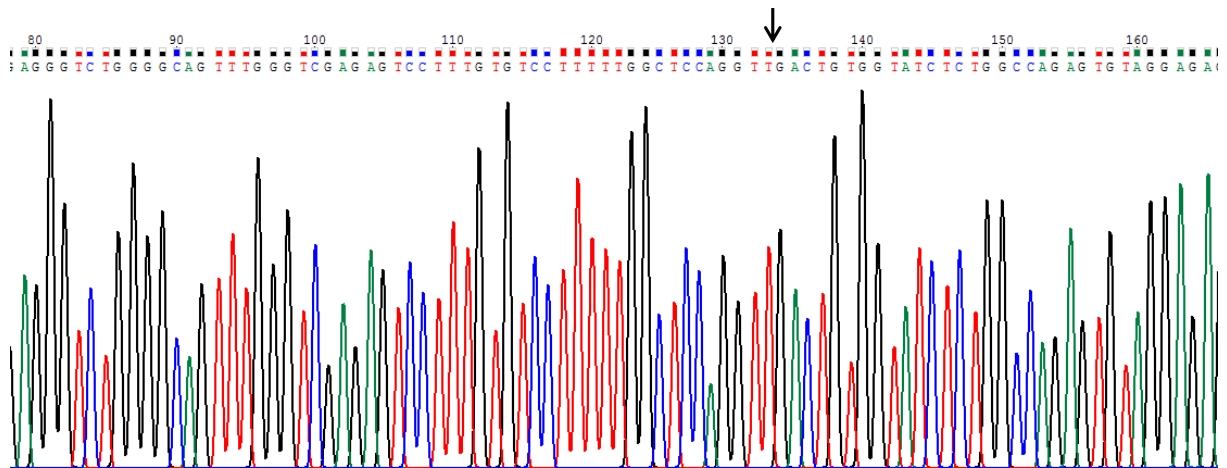

| Score         | Expect  | Identities                                                    | Gaps      | Strand     | Frame |
|---------------|---------|---------------------------------------------------------------|-----------|------------|-------|
| 254 bits(137) | 2e-71() | 140/141(99%)                                                  | 1/141(0%) | Plus/Minus |       |
| Features:     |         |                                                               |           |            |       |
| Query         | 69      | ACCTCTGGAGAGGGTCTGGGGCAGTTTGGGTCGAGAGTCCCTTTGTGTCCCTTTTGGCTCC | 128       |            |       |
| Sbjct         | 141     | .....G.....                                                   | 82        |            |       |
| Querv         | 129     | AGGTT-GACTGTGGTATCTCTGGCCAGAGTGTAGGAGAGGGCCACAAGGAGCAAGAATGC  | 187       |            |       |
| Sbjct         | 81      | .....T.....                                                   | 22        |            |       |
| Query         | 188     | TGACACTGGAATTTTCTCCAT                                         | 208       |            |       |
| Sbjct         | 21      | .....                                                         | 1         |            |       |

B

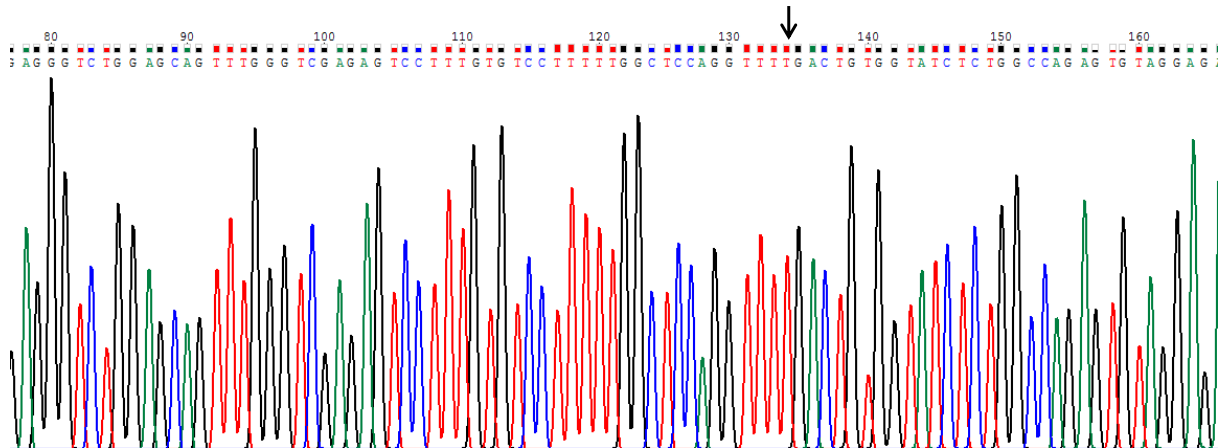

| Score         | Expect  | Identities                                                    | Gaps      | Strand     | Frame |
|---------------|---------|---------------------------------------------------------------|-----------|------------|-------|
| 250 bits(135) | 3e-70() | 140/142(99%)                                                  | 1/142(0%) | Plus/Minus |       |
| Features:     |         |                                                               |           |            |       |
| Querv         | 68      | ACCTCTGGAGAGGGTCTGGAGCAGTTTGGGTCGAGAGTCCCTTTGTGTCCCTTTTGGCTCC | 127       |            |       |
| Sbjct         | 141     | .....G.....                                                   | 82        |            |       |
| Querv         | 128     | AGGTTTGGACTGTGGTATCTCTGGCCAGAGTGTAGGAGAGGGCCACAAGGAGCAAGAATG  | 187       |            |       |
| Sbjct         | 81      | .....-.....                                                   | 23        |            |       |
| Query         | 188     | CTGACACTGGAATTTTCTCCAT                                        | 209       |            |       |
| Sbjct         | 22      | .....                                                         | 1         |            |       |

C

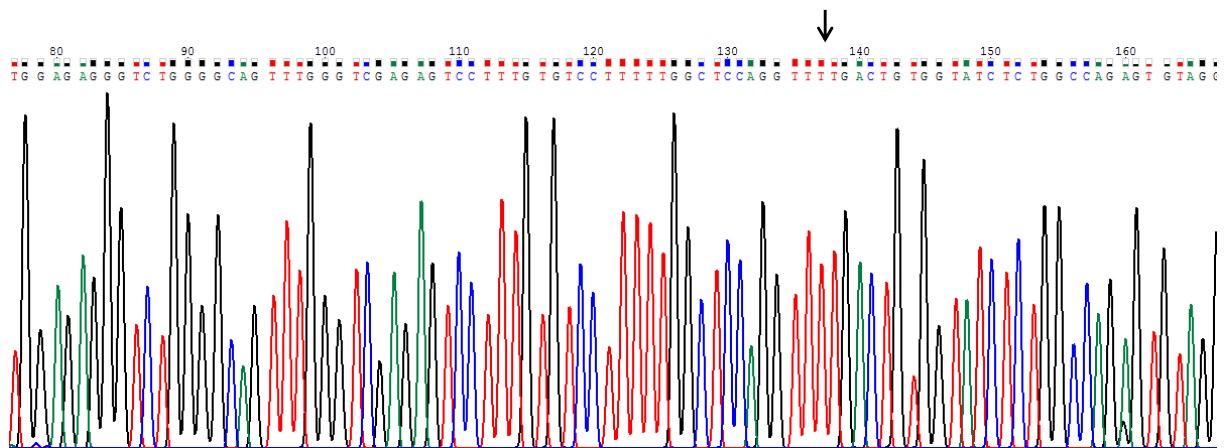

| Score         | Expect  | Identities                                                   | Gaps      | Strand     | Frame |
|---------------|---------|--------------------------------------------------------------|-----------|------------|-------|
| 255 bits(138) | 6e-72() | 141/142(99%)                                                 | 1/142(0%) | Plus/Minus |       |
| Features:     |         |                                                              |           |            |       |
| Query         | 72      | ACCTCTGGAGAGGGTCTGGGGCAGTTTGGGTCGAGAGTCCTTTGTGTCCPTTTGGCTCC  |           |            | 131   |
| Sbjct         | 141     | .....                                                        |           |            | 82    |
| Query         | 132     | AGGTTTGGACTGTGGTATCTCTGGCCAGAGTGTAGGAGAGGGCCACAAGGAGCAAGAATG |           |            | 191   |
| Sbjct         | 81      | .....                                                        |           |            | 23    |
| Query         | 192     | CTGACACTGGAATTTTCTCCAT                                       |           |            | 213   |
| Sbjct         | 22      | .....                                                        |           |            | 1     |

Figure S1: Sequencing analysis to identify mutations prepared by CRISPR/Cas9 that are responsible for *AGR2* gene knockout.

(A) Deletion 76T was observed in A549 AGR2KO clone G9; (B) Insertion 75T was detected in both A549 AGR2KO clones G9 and G2; (C) Insertion 75T was also detected in the second allele of A549 AGR2KO G2 clone.
