# Supplementary material for: Suppression of AGR2 in a TGF-β-induced Smad regulatory pathway mediates epithelial-mesenchymal transition
Source: PubMed Central journal article supplement (PMC5557473; doi:10.1186/s12885-017-3537-5), 2017-08-15
Supplement: 12885_2017_3537_MOESM2_ESM.pdf [file 12885_2017_3537_MOESM2_ESM.pdf]

| <b>Gene</b>  | <b>Forward</b>                       | <b>Reverse</b>                    |
|--------------|--------------------------------------|-----------------------------------|
| <i>AGR2</i>  | <b>GGAGCTCTATATAAAATCCAAGACAAGCA</b> | <b>GCCAATTTCTGGATTTCTTTATTTTC</b> |
| <i>GAPDH</i> | <b>GAAGGTGAAGGTCGGAGTC</b>           | <b>GAAGATGGTGATGGGATTTC</b>       |
| <i>CDH1</i>  | <b>GACACACCCCCTGTTGGTGT</b>          | <b>CAGCCATCCTGTTTCTCTTTCAA</b>    |
| <i>CDH2</i>  | <b>ATCTCGGGTCAGCTGTCGG</b>           | <b>GGCTATCTGCTCGCGATCC</b>        |
| <i>VIM</i>   | <b>GGAACAGCATGTCCAAATCGA</b>         | <b>GCCGTGAGGTCAGGCTTG</b>         |
| <i>ZEB1</i>  | <b>CACTGGTGGTGGCCCATAC</b>           | <b>TGCACCATGCCCTGAGG</b>          |
| <i>SNAI2</i> | <b>TGTGTGGACTACCGCTGCTC</b>          | <b>GAGAGGCCATTGGGTAGCTG</b>       |

**Table S1:** Sequences of the primers used in quantitative PCR analysis.
